# Supplementary material for: Deciphering the electron transfer mechanisms for biogas upgrading to biomethane within a mixed culture biocathode
Source: Royal Society of Chemistry journal article supplement (doi:10.1039/c5ra09039c), 2015-01-01
Supplement: c5ra09039c1.pdf [file c5ra09039c1.pdf]

1 **Deciphering the electron transfer mechanisms for biogas**  
2 **upgrading to biomethane within bioelectrochemical systems**

3

4 Pau Batlle-Vilanova<sup>a</sup>, Sebastià Puig<sup>a\*</sup>, Rafael Gonzalez-Olmos<sup>a,b</sup>, Anna Vilajeliu-Pons<sup>a</sup>,  
5 M. Dolors Balaguer<sup>a</sup>, Jesús Colprim<sup>a</sup>

6 <sup>a</sup>LEQUIA, Institute of the Environment, University of Girona. Campus Montilivi, E-17071 Girona,  
7 Catalonia, Spain.

8 <sup>b</sup>Chemical Engineering Department. IQS-School of Engineering, Ramon Llull University, Via  
9 Augusta 390, Barcelona 08017, Spain

10

11 **Electronic supplementary information (ESI)**

12

13 **Summary**

14 This supporting information material provides some extra information about the  
15 materials and methods and the results obtained in batch and continuous mode, as well  
16 as calculations on the CE losses, and a more detailed composition of the microbial  
17 community of the biocathode. Seven additional figures and one table are presented  
18 within this document, which was divided into five different sections.

19 **Section S1. Schematic representation of the BES and the equipment.**

20 **Figure S1.** Schematic representation of the BES design and the equipment used in the  
21 present study.

22

23 **Section S2. Calculation of the cathode surface area.**

24

25 **Section S3. Operational conditions and start-up of the BES.**

26 **Figure S2.** Mode of operation, cathode potential, and carbon source of the BES.  
27 Dashed lines at the beginning of each period indicate the day at which changes were  
28 applied.

29 **Figure S3.** Current demand of the biocathode during the start-up period.

30

31 **Section S4. BES performance during batch test and continuous operation**

32 **Figure S4.** Methane cumulated over time during batch tests 1, 6 and 13. Regression  
33 coefficient ( $r^2$ ) and the continuous line correspond to the linear plot obtained.

34 **Figure S5.** Comparative analysis between the CE, current demand, pH and production  
35 rate obtained during batch tests.

36

37 **Section S5. Microbial analyses**

38 **Figure S6.** SEM image of the biocathode graphite surface.

39 **Figure S7.** Detailed results obtained for the pyrosequencing analyses of the biocathode  
40 microbial community.

41

42 **Section S6. Calculation of the CE losses**

43 **Table S1.** Calculation of the  $CCR_{SO_4^{2-}}$ ,  $CCR_{O_2}$  and  $CE_{loss}$  of the BES.

44

45

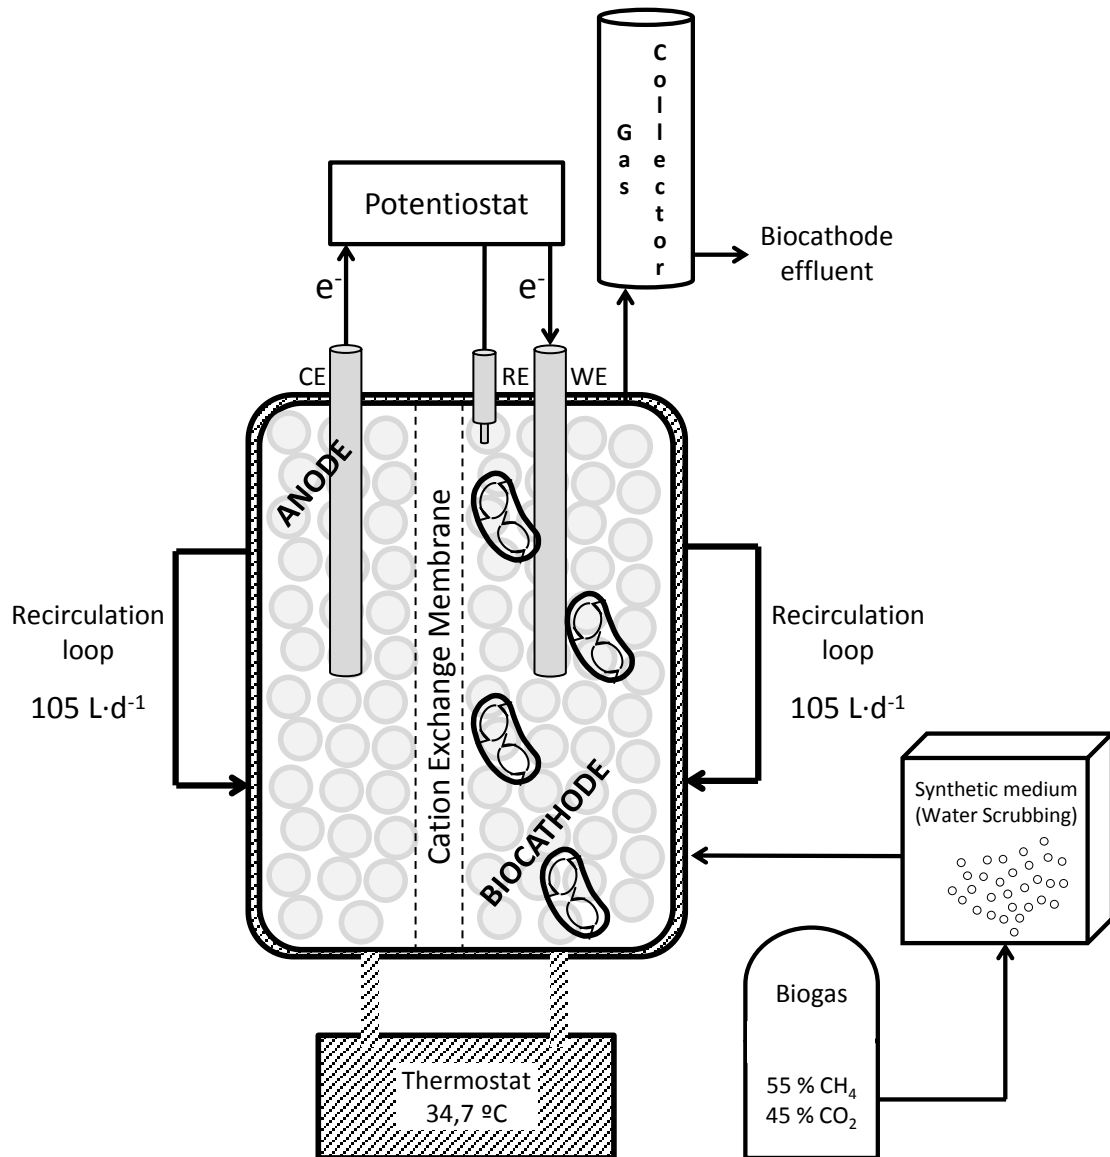

47

48 **Figure S1.** Schematic representation of the BES design and the equipment used in the  
 49 present study.

50

51

52 **Section S2. Calculation of the cathode surface area**

53 To calculate the electrode surface of the cathode it was assumed that granular  
54 graphite was in form of spheres with a diameter of 4 mm ( $r=2\text{mm}$ ).

55 The Area/ $m_{\text{NCC}}^3$  ratio was calculated using the volume and area equations (equation  
56 and 2, respectively) of the sphere and using the net volume of the cathode chamber.

57 (1)  $V = \frac{4}{3}\pi r^3$

58 (2)  $A = 4\pi r^2$

59 Where, V is the volume of the sphere in  $\text{m}^3$ , A is the area in  $\text{m}^2$ , and r is the radius in m.

60 The volume of a sphere of granular graphite was  $3.35 \cdot 10^{-8} \text{ m}^3$ .

61 The number of spheres in the cathode can be subtracted from the ratio between the  
62 volume occupied by the spheres and the volume of each sphere.

63 The volume occupied by the spheres was  $3.8 \cdot 10^{-4} \text{ m}^3$ .

64 The number of spheres was 11340.

65 The area of a sphere of granular graphite was  $5.03 \cdot 10^{-5} \text{ m}^2$ .

66 The total area is obtained from multiplying the area of each sphere by the number of  
67 spheres. The total area was **0.57  $\text{m}^2$** .

68

69

70 **Section S3. Operational conditions and start-up of the BES.**

71 The BES was inoculated and started-up in continuous mode until an stable current  
 72 demand and methane production were observed. Figure S1 show the diferent periods  
 73 and the initial and end days for each of them. Figure S2 demonstrate the current  
 74 demand of the biocathode during the start-up period (i.e. from day 0 to 159).

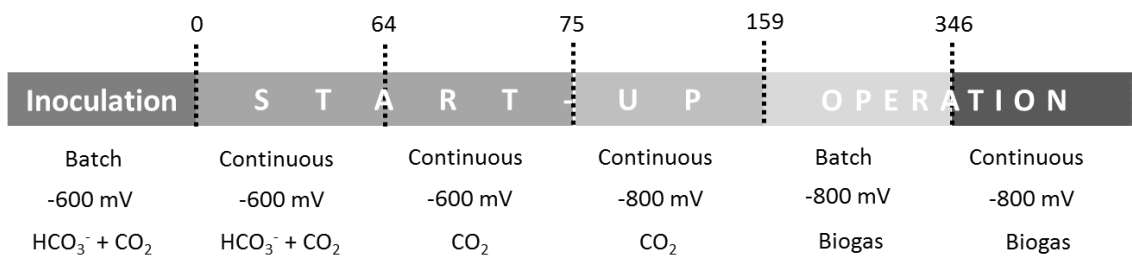

75 **Figure S2.** Mode of operation, cathode potential, and carbon source of the BES.  
 76

77 Dashed lines at the beginning of each period indicate the day at which changes were  
 78 applied.

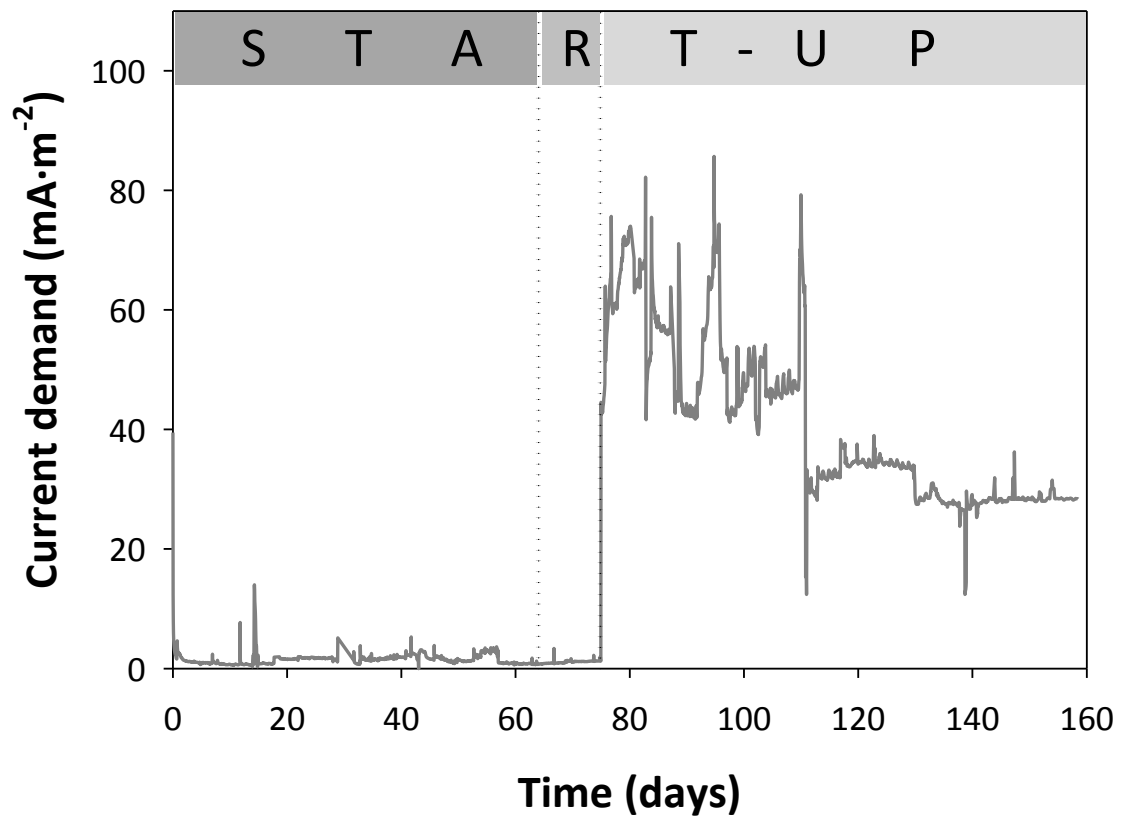

79

80 **Figure S3.** Current demand of the biocathode during the start-up period.

81

82

83 **Section S4. BES performance during batch test and continuous operation**

84 The amount of methane harvested over time in the most representative tests and the  
85 regression coefficient ( $r^2$ ) obtained for each plot are presented in figure S3. A  
86 comparative analysis of the different parameters of the system was performed to  
87 discern whether some parameters of the BES were related, and are shown in figure S4.  
88 It was found that there was not a direct relationship, except for the current demand  
89 and the production rate ( $r^2 = 0.990$ ).

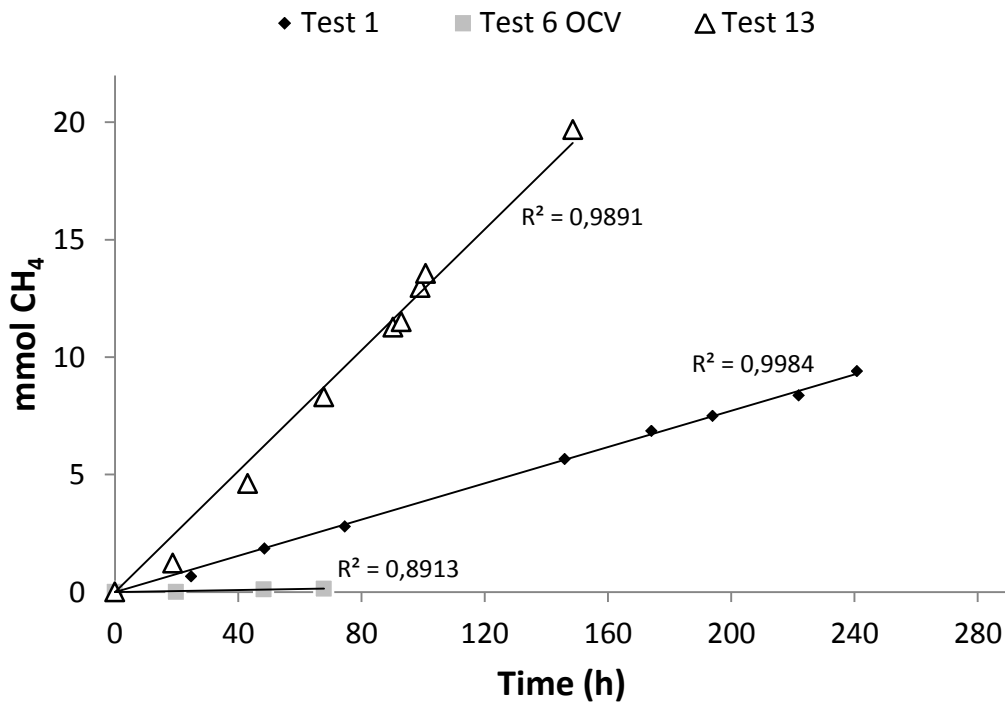

90

91 **Figure S4.** Methane cumulated over time during batch tests 1, 6 and 13. Regression  
92 coefficient ( $r^2$ ) and the continuous line correspond to the linear plot obtained.

93



94

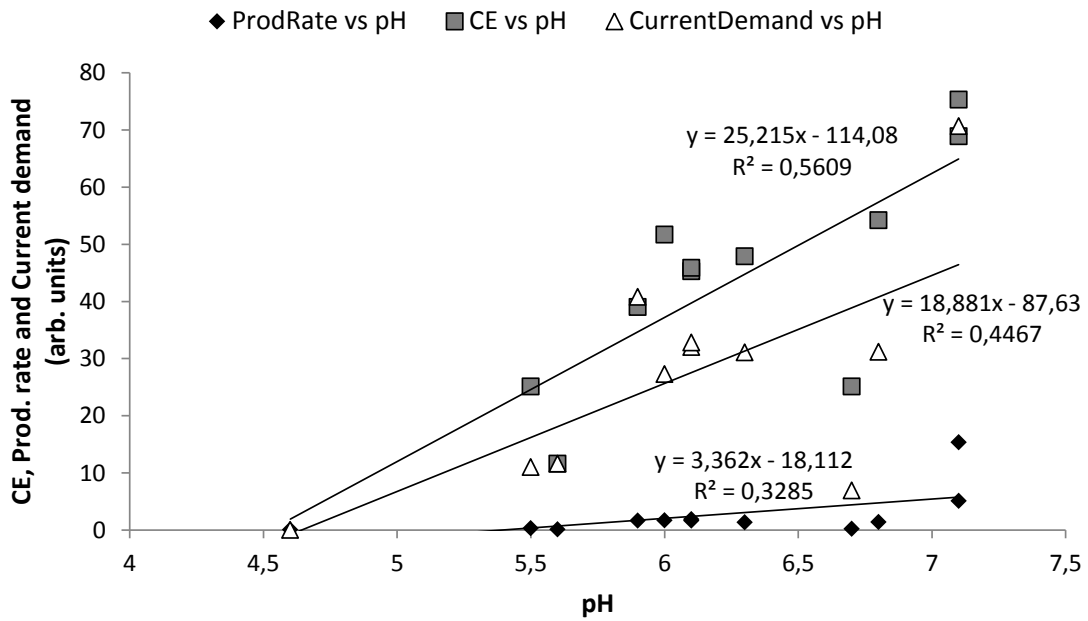

95

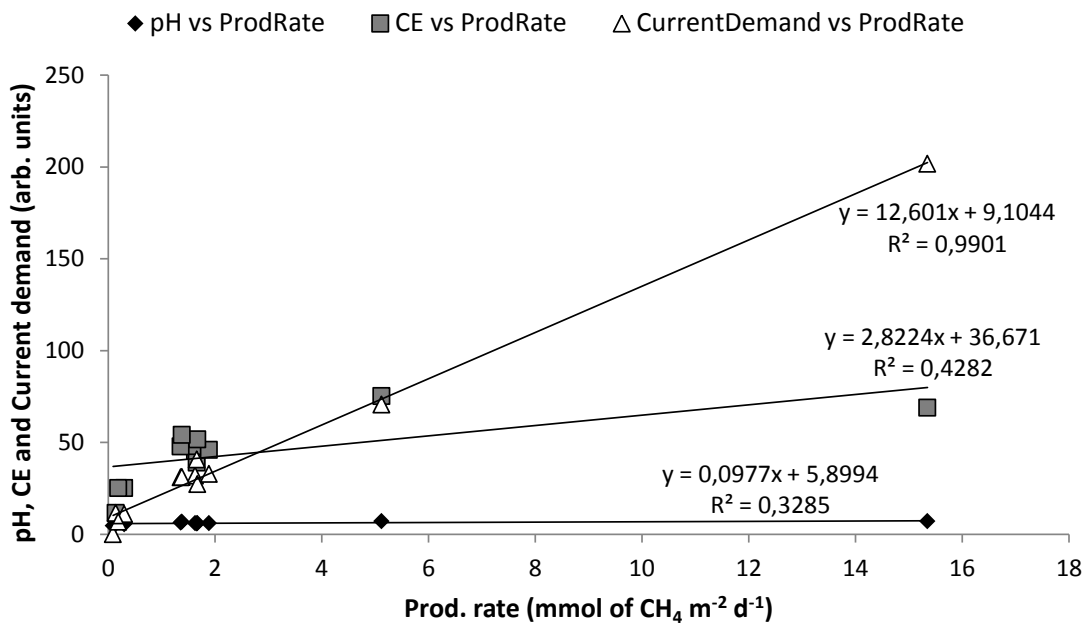

96

97 **Figure S5a.** Comparative analysis between the CE, current demand, pH and production

98 rate obtained during batch tests.

99

100

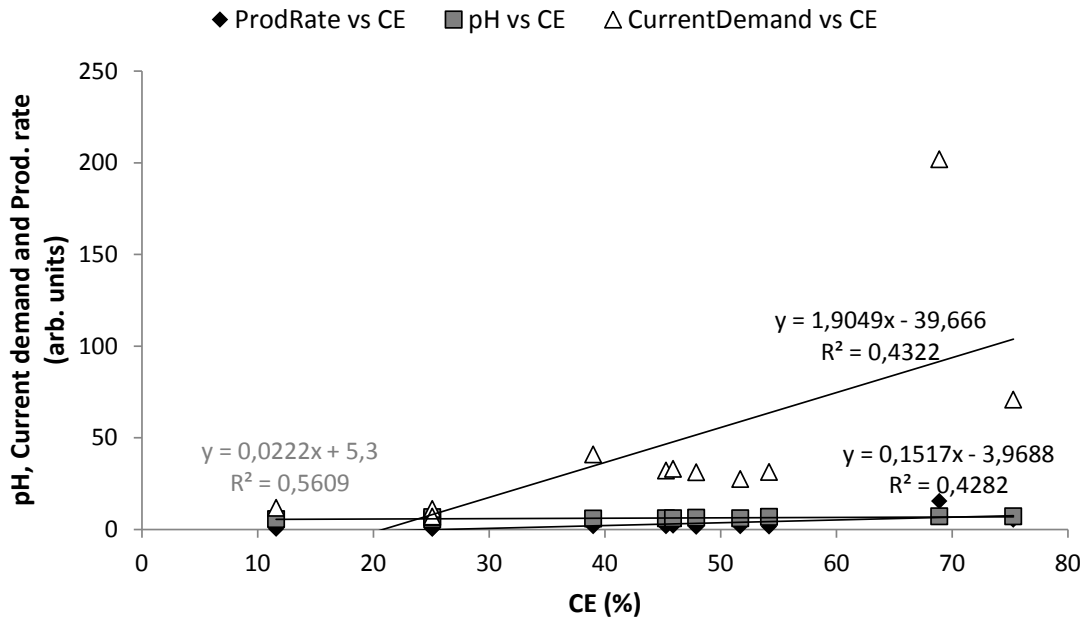

101

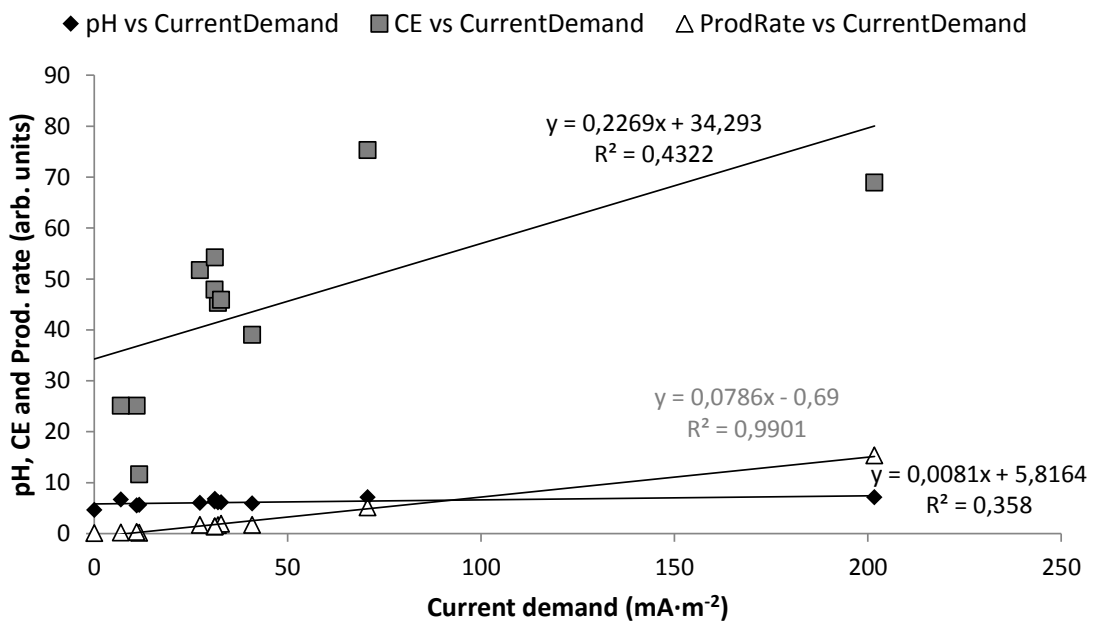

102

103 **Figure S5b.** Comparative analysis between the CE, current demand, pH and production

104 rate obtained during batch tests.

105

106

107 **Section S5. Microbial analyses**

108 Qualitative microbial analyses, such as scanning electron microscopy (SEM), were  
109 performed in graphite samples extracted from the biocathode. The materials and  
110 methods, and SEM images from the biocathode samples are shown in figure S5. The  
111 complete results from the pyrosequencing analyses of the microbial community of the  
112 biocathode are shown in high resolution in figure S6.

113 ***Scanning electron microscopy (SEM)***

114 SEM analysis was performed at the same time as microbial community composition  
115 analysis (before starting test 3). Graphite samples from the biotic and abiotic MEC  
116 were extracted to compare the electrode surface. The samples were immersed in 2.5%  
117 (w/v) glutaraldehyde in a 0.1 M cacodylate buffer at pH 7.4 for a period of 4 hours.  
118 Next, the samples were washed and dehydrated in an ethanol series. Washes were  
119 done with cacodylate buffer and with water, both per duplicate. Dehydration with  
120 graded ethanol followed temperature steps of 50, 75, 80, 90, 95 and 3x100 °C in  
121 periods of 20 minutes. The fixed samples were dried with a critical-point drier (model  
122 K-850 CPD, Emitech, Alemany) and sputtered-coated with a 40 nm gold layer. The  
123 coated samples were examined with a SEM (model DSM-960; Zeiss, Germany) at 20 kV  
124 and images were captured digitally. Energy-dispersive X-ray spectroscopy (EDX;  
125 QUANTAX Microanalysis System) was also performed in the abiotic MEC graphite  
126 samples in order to identify the compounds deposited on the surface. Analyzed  
127 samples were not pretreated. Digital images of both SEM and EDX analysis were  
128 collected and processed by ESPRIT 1.9 BRUKER program (AXS Microanalysis GmbH,  
129 Berlin, Germany).

130

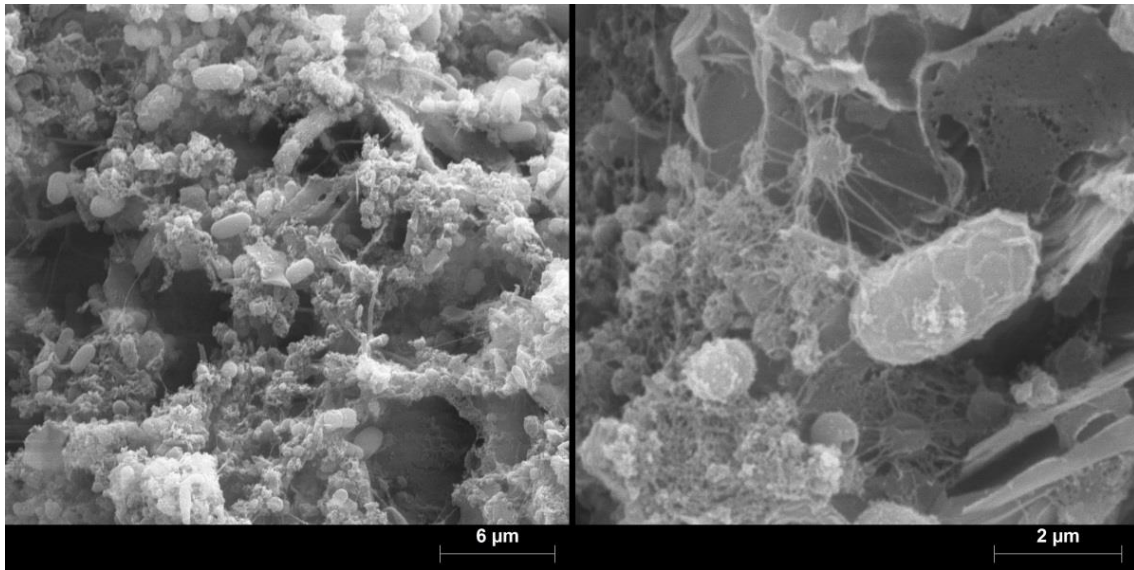

131

132 **Figure S6.** Scanning electron microscopy (SEM) image of the biocathode graphite  
133 surface.

134

135

136

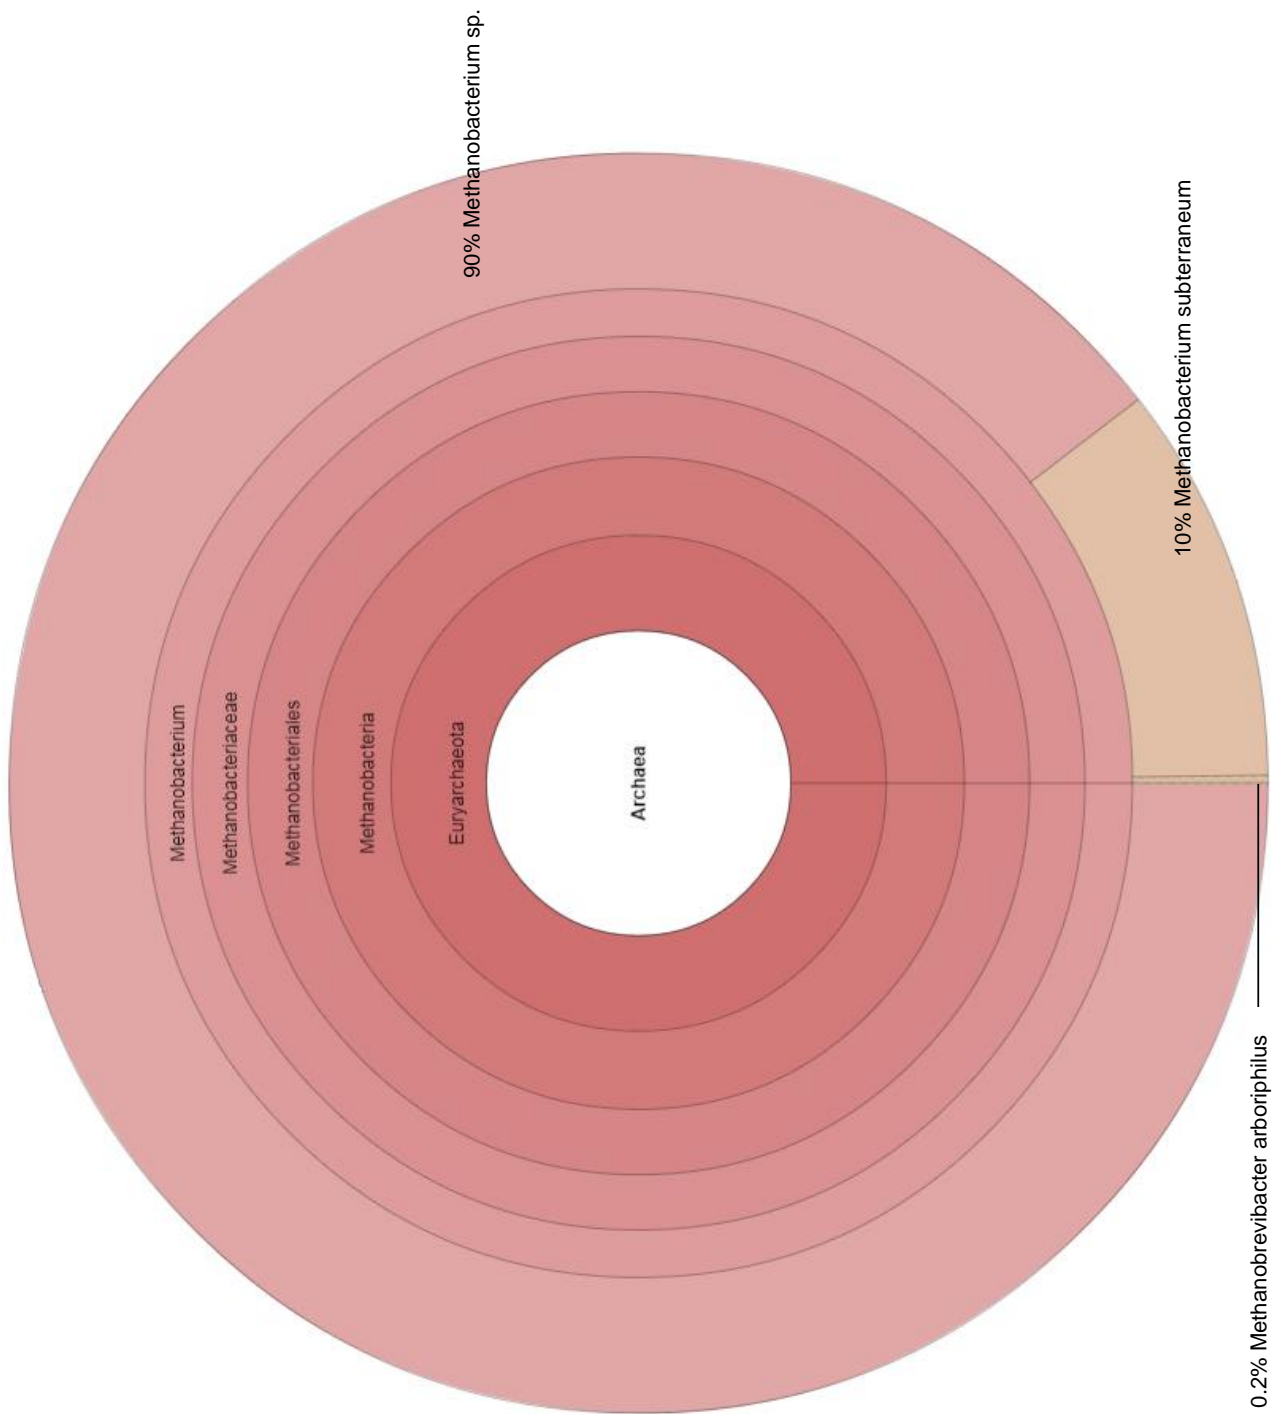

137

138 **Figure S7a.** Detailed results obtained for the pyrosequencing analyses of the  
 139 biocathode microbial community.

140

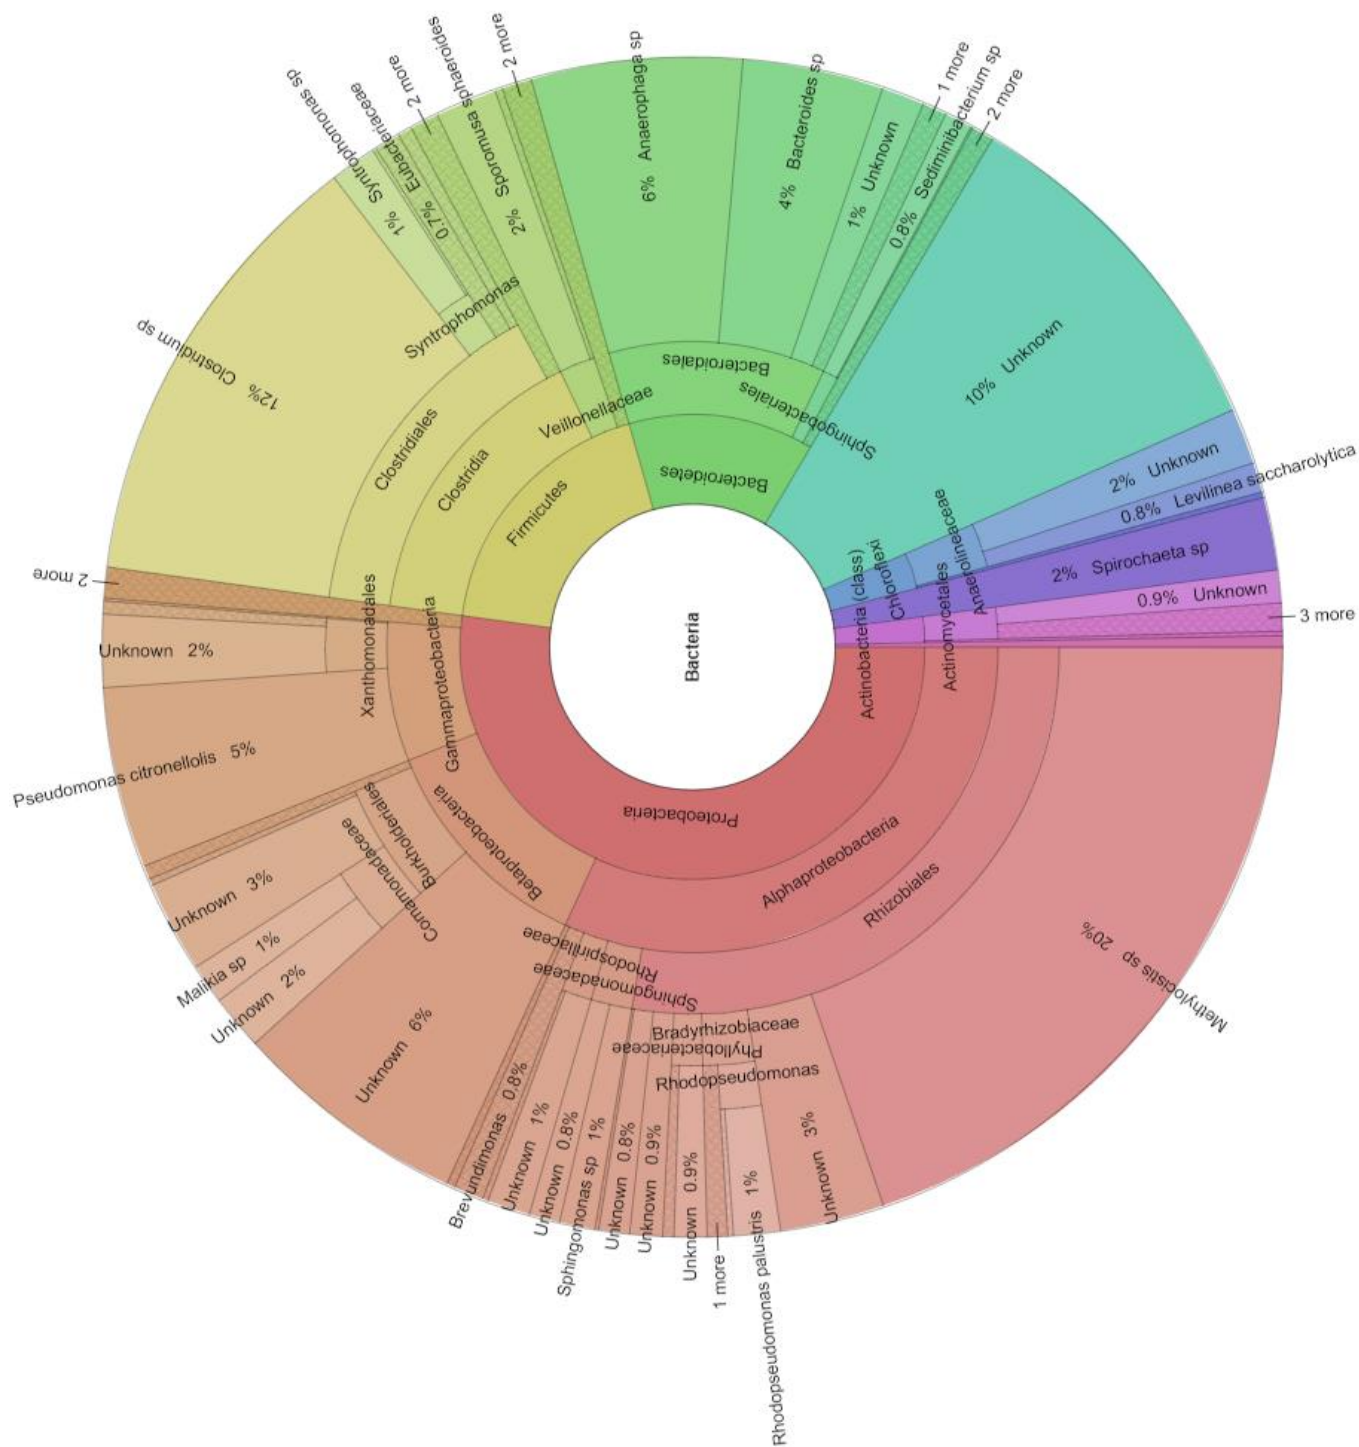

141

142 **Figure S7b.** Detailed results obtained for the pyrosequencing analyses of the  
 143 biocathode microbial community.

144

145 **Section S6. Calculation of the CE losses**

146 The coulombs consumed by cross-over reactions were quantified from the oxygen  
147 diffusion and the sulphate reduction in the biocathode, and compared to the  
148 Coulombs consumed for methane production to estimate the CE losses according to  
149 equation 3.

150 (3)  $CE_{\text{loss}}(\%) = 100 \cdot (CCR_{O_2} + CCR_{SO_4^{2-}})/CRR$

151 Where CCR is the coulombic consumption rate obtained from the coulombs consumed  
152 over time,  $CCR_{O_2}$  is the coulombic consumption rate due to oxygen oxidation and  
153  $CCR_{SO_4^{2-}}$  is the coulombic consumption rate due to sulphate reduction.

154 CCR,  $CCR_{SO_4^{2-}}$  and  $CCR_{O_2}$  are expressed in Coulombs  $d^{-1}$ .  $CCR_{CH_4}$  and  $CCR_{SO_4^{2-}}$  were  
155 calculated according to equation 4 and 5, respectively:

156 (4)  $CCR_{CH_4} = 8 \cdot m_{CH_4} \cdot F$

157 (5)  $CCR_{SO_4^{2-}} = 8 \cdot m_{SO_4^{2-}} \cdot F$

158 In equation 2,  $m_{CH_4}$  is the slope of the linear plot obtained from the moles of methane  
159 harvested over time (moles  $d^{-1}$ ), 8 are the number of electrons consumed per mole of  
160 methane produced, and F is Faraday's constant (96485 C mole of electrons $^{-1}$ ). In  
161 equation 3,  $m_{SO_4^{2-}}$  is the slope corresponding to the sulphate consumption rate (moles  
162  $d^{-1}$ ), and 8 are the number of electron consumed to reduce one mole of sulphate to  
163 hydrogen sulphide, according to equation 6.

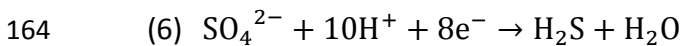

165 Once in the cathode chamber, oxygen can be electrochemically reduced according to  
166 Equation 7, or used to biologically oxidize methane by *Methylocystis* sp. according to  
167 Equation 8.

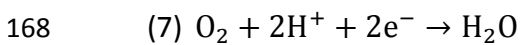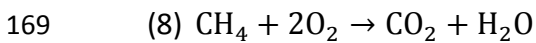

170 Therefore,  $CCR_{O_2}$  can be calculated by two different equations, one considering  
171 directly  $O_2$  reduction (equation 9) and the other considering the methane consumed  
172 (equation 10).

173 (9)  $CCR_{O_2} = J_{O_2} \cdot A \cdot 2 \cdot F$

174 (10)  $CCR_{O_2} = \frac{J_{O_2} \cdot A \cdot 8 \cdot F}{2}$

175

176 Where in equation 9,  $J_{O_2}$  is the oxygen diffusion flux ( $mol_{O_2} m^{-2} d^{-1}$ ), A is the membrane  
177 area ( $0,04 m^2$ ), 2 is the moles of electron that are electrochemically consumed per

178 mole of oxygen, and F is Faraday's constant. In equation 10, 8 correspond to the moles  
 179 of electrons consumed per mole of methane produced, and 2 to the number of moles  
 180 of oxygen necessary to oxidize 1 mole of methane (equation 8).

181 Oxygen diffusion flux ( $J_{O_2}$ ) was calculated according to other authors,<sup>1</sup> from Equation  
 182 11.

$$183 \quad (11) \quad J_{O_2} = \frac{D_{O_2} \cdot (C_{O_2,an} - C_{O_2,cat})}{\delta}$$

184 Where  $D_{O_2}$  is the is the diffusion coefficient of oxygen determined for a CMI-7000  
 185 cation exchange membrane (Membrane International Inc.,USA) ( $3.72 \cdot 10^{-5} \text{ m}^2 \text{ d}^{-1}$ ).<sup>2</sup>  
 186  $C_{O_2,an}$  and  $C_{O_2,cat}$  are the dissolved oxygen concentration in the anode and cathode  
 187 compartments (mole  $O_2 \text{ m}^{-3}$ ), respectively; and  $\delta$  the thickness of the membrane  
 188 ( $0.45 \cdot 10^{-3} \text{ m}$ ). The resulting units for oxygen diffusion flux are mole  $O_2 \text{ m}^{-2} \text{ d}^{-1}$ .

189

**Table S1.** Calculation of the  $CCR_{SO_4^{2-}}$ ,  $CCR_{O_2}$  and  $CE_{loss}$  of the BES.

| Test | CE (%)     | CRR ( $C \text{ d}^{-1}$ ) | $CCR_{SO_4^{2-}}$ ( $C \text{ d}^{-1}$ ) | $CCR_{O_2}$ Eq. 7 ( $C \text{ d}^{-1}$ ) | $CCR_{O_2}$ Eq. 8 ( $C \text{ d}^{-1}$ ) | $CE_{loss}$ (%) |
|------|------------|----------------------------|------------------------------------------|------------------------------------------|------------------------------------------|-----------------|
| 1    | 45.3 ± 1.9 | 1583.1                     | 1.8                                      | 178.9                                    | 356.8                                    | 11.3 - 22.5     |
| 2    | 39.0 ± 1.6 | 1877.8                     | 1.8                                      | 178.9                                    | 356.8                                    | 9.5 - 19.0      |
| 3    | 47.9 ± 5.8 | 1265.1                     | 1.8                                      | 178.9                                    | 356.8                                    | 14.1 - 28.2     |
| 4    | 45.9 ± 3.6 | 1818.1                     | 1.8                                      | 178.9                                    | 356.8                                    | 9.8 - 19.6      |
| 5    | 51.7 ± 4.5 | 1425.4                     | 1.8                                      | 178.9                                    | 356.8                                    | 12.5 - 25.0     |
| 6    | n/a        | n/a                        | n/a                                      | n/a                                      | n/a                                      | n/a             |
| 7    | 11.6 ± 0.9 | 533.3                      | 1.8                                      | 178.9                                    | 356.8                                    | 33.5 - 66.9     |
| 8    | 25.1 ± 4.7 | 541.0                      | 1.8                                      | 178.9                                    | 356.8                                    | 33.1 - 66.0     |
| 9    | 25.1 ± 2.3 | 342.5                      | 1.8                                      | 178.9                                    | 356.8                                    | 52.2 - 104.2    |
| 10   | n/a        | n/a                        | n/a                                      | n/a                                      | n/a                                      | n/a             |
| 11   | n/a        | n/a                        | n/a                                      | n/a                                      | n/a                                      | n/a             |
| 12   | 54.2 ± 8.3 | 1330.2                     | 1.8                                      | 178.9                                    | 356.8                                    | 13.4 - 26.8     |
| 13   | 75.3 ± 5.2 | 3133.3                     | 1.8                                      | 178.9                                    | 356.8                                    | 5.7 - 11.4      |
| 14   | 68.9 ± 0.8 | 6390.8                     | 23.2                                     | 178.9                                    | 356.8                                    | 3.2 - 5.6       |

190

191 In all cases, the major contributor to the CE losses was the oxygen that diffused from  
 192 the anode to the cathode. The presence of *Methylocystis* sp. caused the CE of the BES  
 193 to be lower than it would be considering only pure electrochemical  $O_2$  reduction.



- 194 (1) Van Eerten-jansen, M. C. A. A.; Ter Heijne, A.; Buisman, C. J. N.; Hamelers, H. V.  
195 M. Microbial electrolysis cells for production of methane from CO<sub>2</sub>: long-term  
196 performance and perspectives. *Int. J. Energy Res.* **2012**, 809–819.
- 197 (2) Kim, J. R.; Cheng, S.; Oh, S.-E.; Logan, B. E. Power generation using different  
198 cation, anion, and ultrafiltration membranes in microbial fuel cells. *Environ. Sci.*  
199 *Technol.* **2007**, 41, 1004–1009.
